# Supplementary material for: Rapid characterisation of Klebsiella oxytoca isolates from contaminated liquid hand soap using mass spectrometry, FTIR and Raman spectroscopy
Source: Royal Society of Chemistry journal article supplement (doi:10.1039/c5fd00165j), 2015-12-08
Supplement: c5fd00165j1.pdf [file c5fd00165j1.pdf]

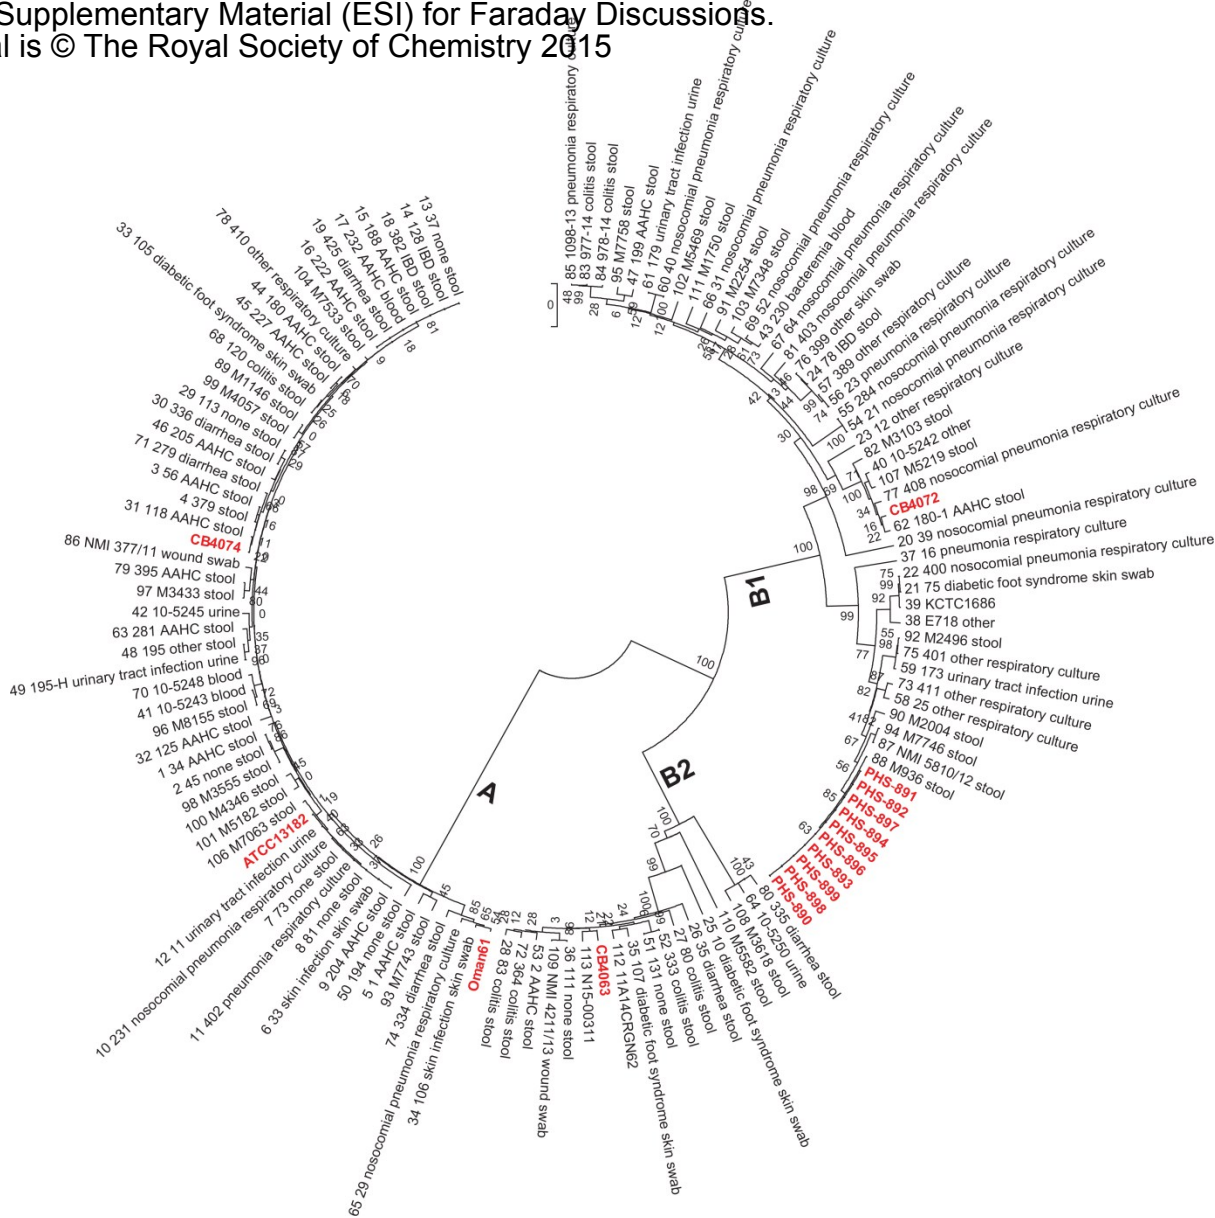

**Supplemental Figure S1.**

Radial Dendrogram produced by MLST on the basis of seven housekeeping genes (*gapA*, *infB*, *mdh*, *pgi*, *phoE*, *rpoB*, *tonB*). Allele sequences were concatenated to generate a 3,003 bp concatemer for each strain. A phylogenetic tree was constructed in MEGA ver. 6 using UPGMA. Distances were computed using Maximum Composite Likelihood and the reliability of the tree was assessed by bootstrap analysis with 1,000 replicates. Sequences of 113 isolates present in the PubMLST database were included in the analysis. The isolates analysed are displayed in bold.

**Table S1. Allelic profiles of *Klebsiella* sp. isolates and reference strains analysed by MLST**

|                           | <i>gapA</i> | <i>infB</i> | <i>mdh</i> | <i>pgi</i> | <i>phoE</i>                | <i>rpoB</i> | <i>tonB</i> | cluster |
|---------------------------|-------------|-------------|------------|------------|----------------------------|-------------|-------------|---------|
| <i>K. oxytoca</i> PHS-890 | 3           | 5           | 21         | 13         | 20<br>( <sup>62</sup> C→T) | 6           | 12          | B1      |
| <i>K. oxytoca</i> PHS-891 | 3           | 5           | 21         | 13         | 20<br>( <sup>62</sup> C→T) | 6           | 12          | B1      |

|                                 |                  |                  |                                 |                  |                                |                  |                                                |     |
|---------------------------------|------------------|------------------|---------------------------------|------------------|--------------------------------|------------------|------------------------------------------------|-----|
| <i>K. oxytoca</i> PHS-892       | 3                | 5                | 21                              | 13               | 20<br>( <sup>62</sup> C→T)     | 6                | 12                                             | B1  |
| <i>K. oxytoca</i> PHS-893       | 3                | 5                | 21                              | 13               | 20<br>( <sup>62</sup> C→T)     | 6                | 12                                             | B1  |
| <i>K. oxytoca</i> PHS-894       | 3                | 5                | 21                              | 13               | 20<br>( <sup>62</sup> C→T)     | 6                | 12                                             | B1  |
| <i>K. oxytoca</i> PHS-895       | 3                | 5                | 21                              | 13               | 20<br>( <sup>62</sup> C→T)     | 6                | 12                                             | B1  |
| <i>K. oxytoca</i> PHS-896       | 3                | 5                | 21                              | 13               | 20<br>( <sup>62</sup> C→T)     | 6                | 12                                             | B1  |
| <i>K. oxytoca</i> PHS-897       | 3                | 5                | 21                              | 13               | 20<br>( <sup>62</sup> C→T)     | 6                | 12                                             | B1  |
| <i>K. oxytoca</i> PHS-898       | 3                | 5                | 21                              | 13               | 20<br>( <sup>62</sup> C→T)     | 6                | 12                                             | B1  |
| <i>K. oxytoca</i> PHS-899       | 3                | 5                | 21                              | 13               | 20<br>( <sup>62</sup> C→T)     | 6                | 12                                             | B1  |
| <i>K. oxytoca</i> CB4063        | 5                | 6                | 19                              | 10               | 46                             | 5                | 9<br>( <sup>75</sup> A→G<br><sup>78</sup> G→A) | B2  |
| <i>K. oxytoca</i> CB4074        | 1                | 2                | 2                               | 1                | 4                              | 1                | 2                                              | A   |
| <i>K. oxytoca</i> CB4072        | 3                | 4                | 15<br>( <sup>330</sup> A<br>→T) | 8                | 25                             | 3                | 4                                              | B1  |
| <i>K. oxytoca</i> Oman 61       | 1                | 3                | 13                              | 24               | 2<br>( <sup>321</sup> G<br>→A) | 10               | 10                                             | A   |
| <i>K. oxytoca</i> ATCC 13182    | 2                | 2                | 2                               | 3                | 19                             | 2                | 2                                              | A   |
| <i>K. oxytoca</i> CCUG<br>15788 | 16<br>(16 diff.) | 25<br>(20 diff.) | 39<br>(49 diff.)                | 23<br>(20 diff.) | 15<br>(35 diff.)               | 24<br>(17 diff.) | 34<br>(55 diff.)                               | out |
